# Supplementary material for: Predicting the Global Potential Distribution of Tow Major Vectors of Scrub Typhus Under Future Climate Scenarios
Source: Research Square preprint supplement (doi:10.21203/rs.3.rs-7592864/v1), 2025-09-22
Supplement: Supplementary file 1 [file 80c77ebd8d7c64f6dc52df55.docx]

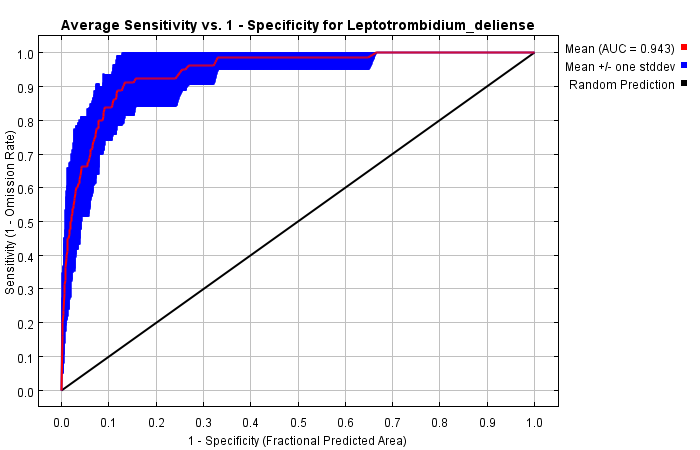

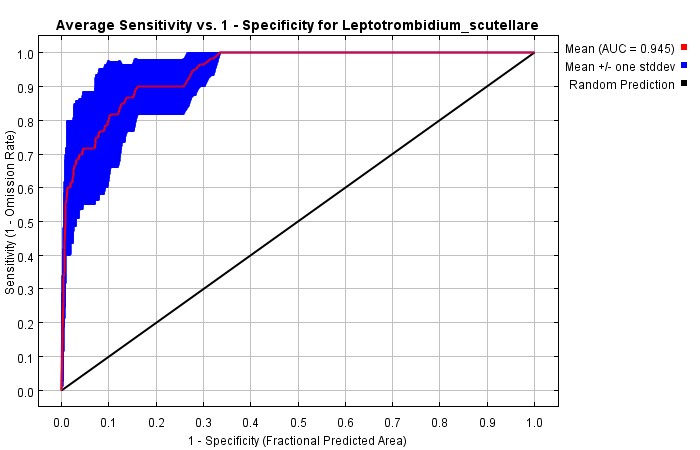


B

A

Figure S1. The validation of the Maxent models (Figure A: *L. deliense*; Figure B: *L. scutellare*).

**
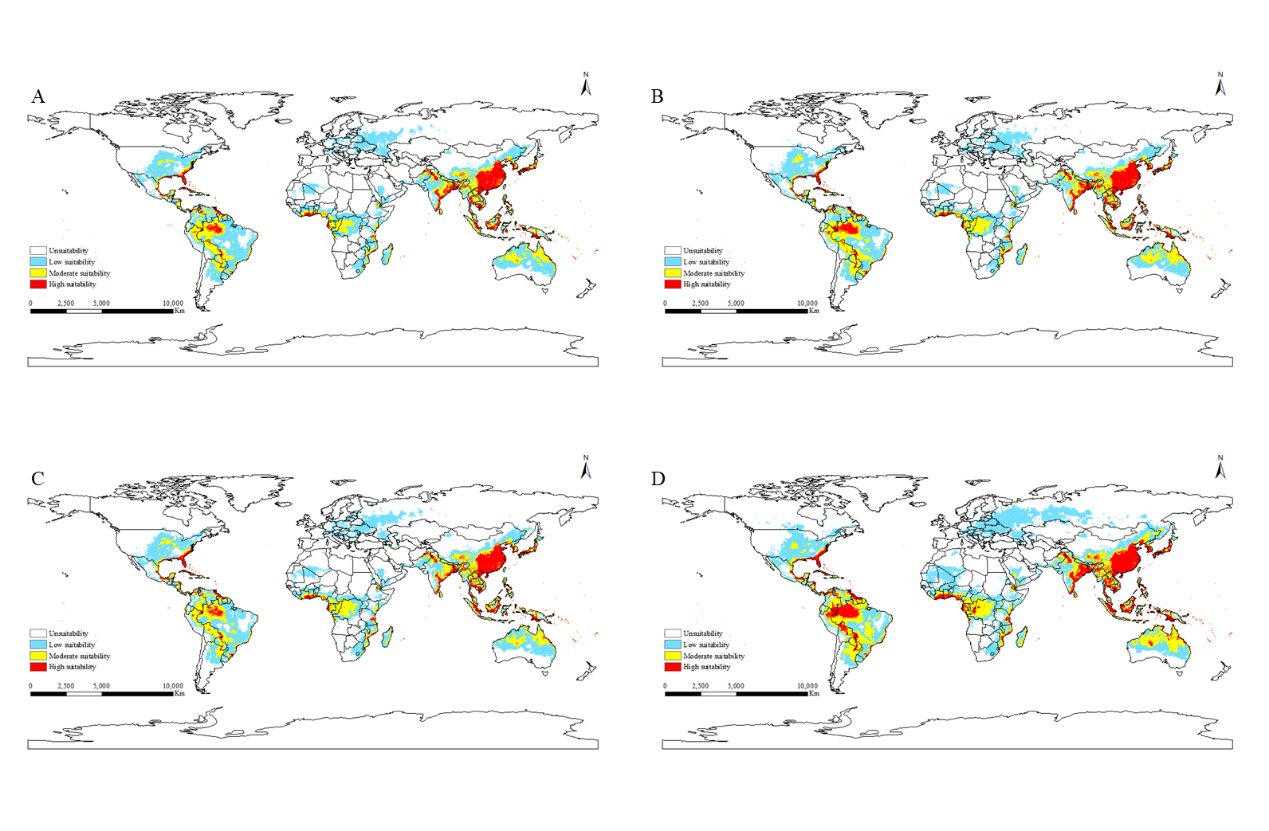
**

Figure S2. Potentially suitable area of *L. deliense* under future climate scenarios (A: SPSS126: 2021-2040; B: SPSS126: 2041-2060; C: SPSS585: 2021-2040; D: SPSS585: 2041-2060).


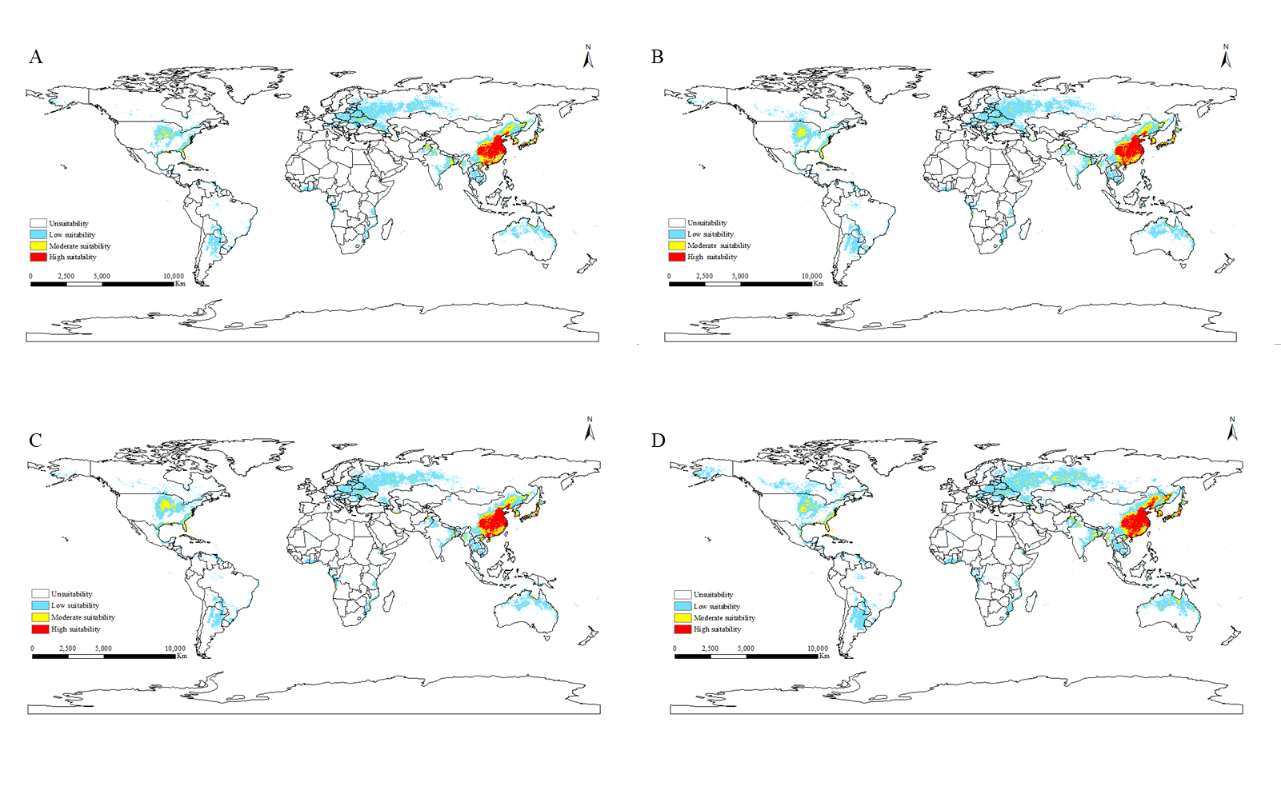


Figure S3. Potentially suitable area of *L. scutellare* under future climate scenarios (A: SPSS126: 2021-2040; B: SPSS126: 2041-2060; C: SPSS585: 2021-2040; D: SPSS585: 2041-2060).
